# Supplementary material for: Loss of Endometrial Sodium Glucose Cotransporter SGLT1 is Detrimental to Embryo Survival and Fetal Growth in Pregnancy
Source: Sci Rep. 2017 Oct 3;7:12612. doi: 10.1038/s41598-017-11674-3 (PMC5626729; doi:10.1038/s41598-017-11674-3)

**Loss of endometrial sodium glucose co-transporter SGLT1 is detrimental to  
embryo survival and fetal growth in pregnancy**

Madhuri S. Salker<sup>1,2</sup>, Yogesh Singh<sup>1</sup>, Ni Zeng<sup>1</sup>, Hong Chen<sup>1</sup>, Shaqiu Zhang<sup>1</sup>, Anja T Umbach<sup>1</sup>, Hajar Fakhri<sup>1</sup>, Ursula Kohlhofer<sup>3</sup>, Leticia Quintanilla-Martinez<sup>3</sup>, Ruban R.P. Durairaj<sup>4</sup>, Flavio S. V. Barros<sup>4</sup>, Pavle Vrljicak<sup>5</sup>, Sascha Ott<sup>5</sup>, Sara Brucker<sup>2</sup>, Diethelm Wallwiener<sup>2</sup>, Ivana Vrhovac Madunić<sup>6</sup>, Davorka Breljak<sup>6</sup>, Ivan Sabolić<sup>6</sup>, Hermann Koepsell<sup>7</sup>, Jan J. Brosens<sup>4</sup> and Florian Lang<sup>1</sup>

**Affiliations:**

Departments of <sup>1</sup>Physiology, Cardiology & Vascular Medicine; <sup>2</sup>Obstetrics, Gynecology & Reproductive Medicine; and <sup>3</sup>Institute of Pathology and Comprehensive Cancer Centre, Eberhard-Karls Universität Tübingen, D-72076 Germany.

<sup>4</sup>Division of Biomedical Sciences, Warwick Medical School, and Tommy's National Centre for Miscarriage Research, University Hospitals Coventry and Warwickshire NHS Trust, Clifford Bridge Rd, Coventry, CV2 2DX, UK; <sup>5</sup>Warwick Systems Biology Centre, University of Warwick, Coventry, CV2 2DX, UK.

<sup>6</sup>Molecular Toxicology Unit, Institute for Medical Research and Occupational Health, 10000 Zagreb, Croatia.

<sup>7</sup>Department of Molecular Plant Physiology and Biophysics, Julius-von-Sachs-Institute, University of Würzburg, D-97082, Germany.

**This PDF file includes:**

Tables S1-S2

Figs. S1 to S6

**Table S1: Patient demographics and characteristics (Samples used in Fig. 4d)**

|                 | Age (years) | Live Birth | Number of Losses | BMI        | LH+ Day    |
|-----------------|-------------|------------|------------------|------------|------------|
| <b>Control*</b> | 36.6 ± 4.32 | 0          | 0                | 24.6 ± 4.5 | 7.6 ± 0.96 |
| <b>RPL</b>      | 38.2± 1.09  | 0.3± 0.48  | 4.9± 1.66        | 25.4± 3.08 | 8.1 ± 1.53 |

Data shown are arithmetic means ± SEM (n = 9 in each group)

RPL; Recurrent Pregnancy Loss

BMI; Body Mass Index

LH+; days after the luteinizing hormone peak

\* The control group consisted of 9 women with conception delay due to endometriosis (n = 1), male factor (n = 2), tubal factor (n = 1), and unexplained infertility (n = 5).

**Table S2 : Patient demographics and characteristics (Samples used in Fig. 4e)**

|                 | Age (years) | Live Birth | Number of Losses | BMI         | LH+ Day    |
|-----------------|-------------|------------|------------------|-------------|------------|
| <b>Control*</b> | 35.2 ± 2.68 | 0          | 0                | 22.4 ± 2.07 | 9 ± 0.70   |
| <b>RPL</b>      | 36.4± 3.28  | 0          | 4± 1.22          | 24.5± 3.10  | 8.2 ± 1.30 |

Data shown are arithmetic means ± SEM (n = 5 in each group)

RPL; Recurrent Pregnancy Loss

BMI; Body Mass Index

LH+; days after the luteinizing hormone peak

\*The control group consisted of 5 women with unexplained infertility.

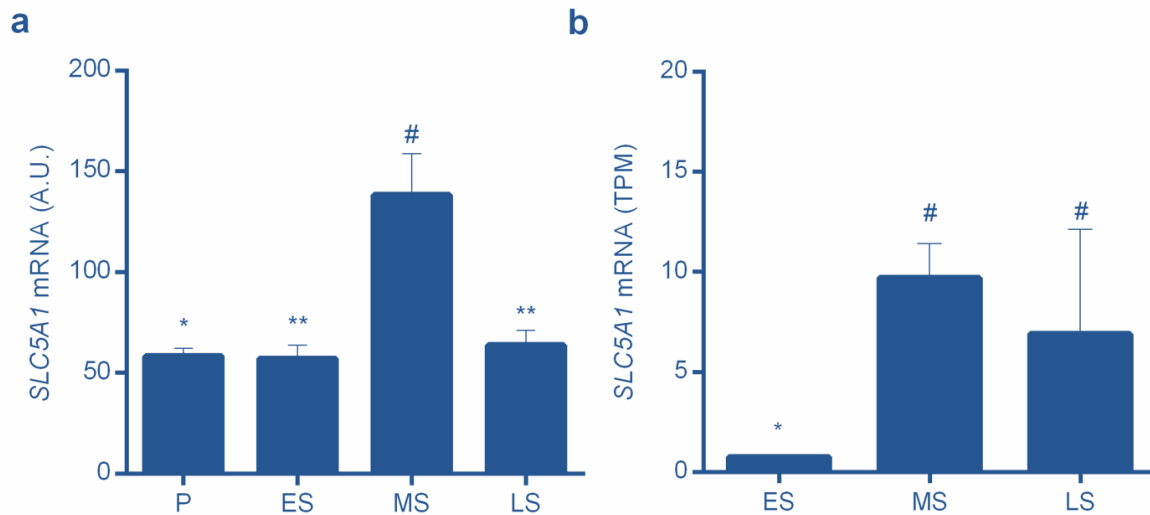

**Figure S1. Expression of *SLC5A1* (SGLT1) in human endometrium.**

(a) Comparison of endometrial *SLC5A1* (*SGLT1*) transcripts, expressed in arbitrary units (A.U.), in proliferative (P), early (ES)-, mid (MS)-, and late (LS)-secretory endometrium. The data were derived from *in silico* analysis of publicly available microarray data [Gene Expression Omnibus (GEO) Profiles; ID: 24461575]. (b) Laser microdissection of glandular epithelium coupled to RNA-sequencing showed a marked rise in *SLC5A1* (*SGLT1*) mRNA, expressed in transcripts per million (TPM), upon transition of the endometrium from the non-receptive early secretory phase (ES; n=3) to the receptive mid-secretory phase (MS; n=3) and late secretory phase (LS; n=11) of the human menstrual cycle. Each bar is mean  $\pm$  SEM of the data collected. Values labelled with # are significantly different from values labelled with \* or \*\* ( $P < 0.05$ ).

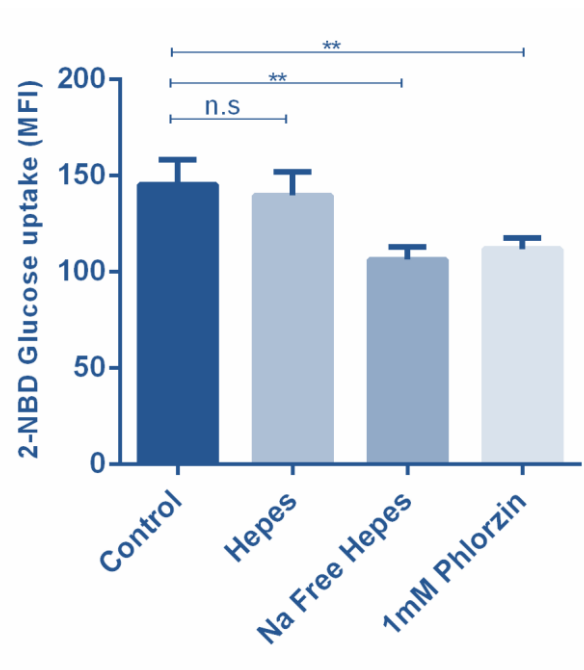

**Figure S2. Cellular glucose uptake is decreased in absence of extracellular Na<sup>+</sup> or in presence of SGLT1 inhibitor Phlorizin.**

Arithmetic means  $\pm$  SEM ( $n = 6$ ) of geometric means (MFI) of the fluorescently labelled glucose analogue 2-(N-(7-nitrobenz-2-oxa-1,3-diazol-4-yl)amino)-2-deoxyglucose (2-NBD Glucose) uptake into endometrial cells in presence of Hepes, Na<sup>+</sup>-free Hepes or Phlorizin (1 mM). \*\* indicates  $P < 0.01$  (Student's  $t$ -test).

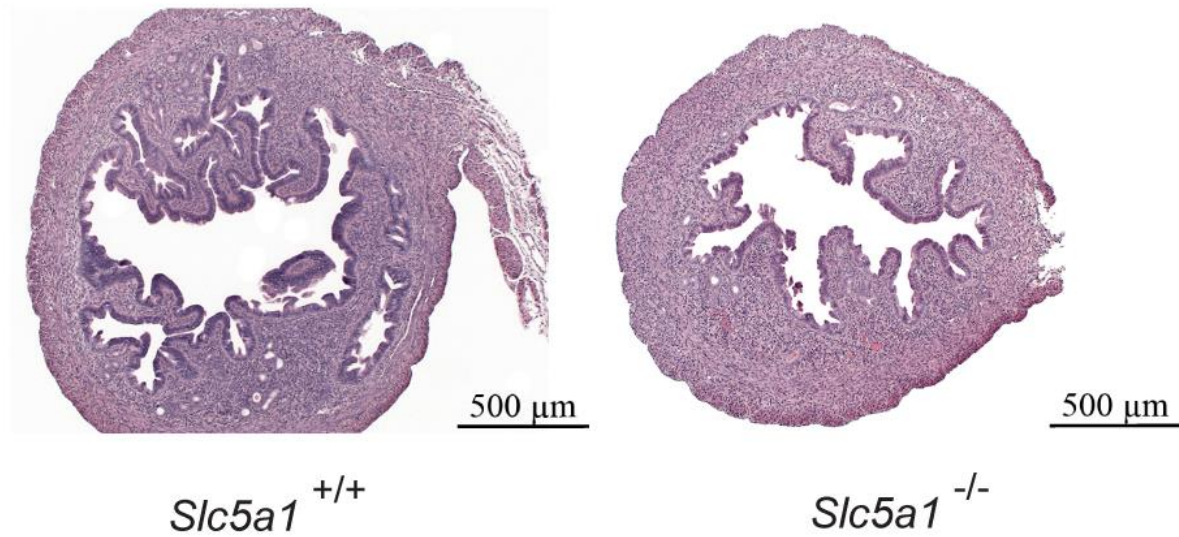

**Figure S3. Loss of SglT1 impairs glandular expansion in the mouse uterus.**

Hematoxylin & Eosin (H&E) stained longitudinal uterine tissue sections were obtained from *Slc5a1*<sup>+/+</sup> (left) and *Slc5a1*<sup>-/-</sup> females (right). The abundance of endometrial glands in uterine cross-sections was reduced in *Slc5a1*<sup>-/-</sup> mice. Figures shown are representative for similar findings in the uteri from n=5 mice. Scale Bar 500  $\mu$ m.

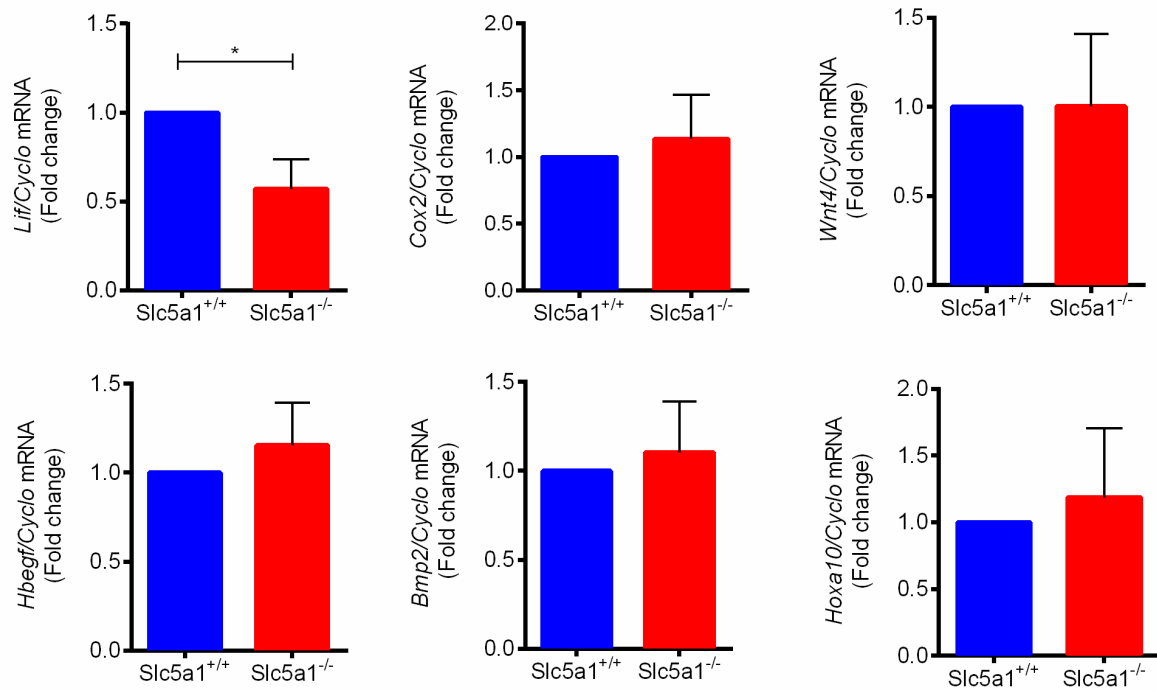

**Figure S4. Expression of key uterine implantation genes in *Slc5a1* (*Sgt1*)-deficient mice.**

Expression genes coding for leukemia inhibitory factor (*Lif*), cyclooxygenase-2 (*Cox2*), Wingless-Type MMTV Integration Site Family, Member 4 (*Wnt4*), Bone Morphogenetic Protein 2 (*Bmp2*), heparin-binding EGF-like growth factor (*Hbegf*), and homeobox A10 (*Hoxa10*) were examined by qRT-PCR in *Slc5a1*<sup>+/+</sup> (Blue) and *Slc5a1*<sup>-/-</sup> (Red) female mice at 7 d.p.c. (n = 6 in each group). Data are presented as fold change \* indicates  $P < 0.05$  (Student's *t*-test).

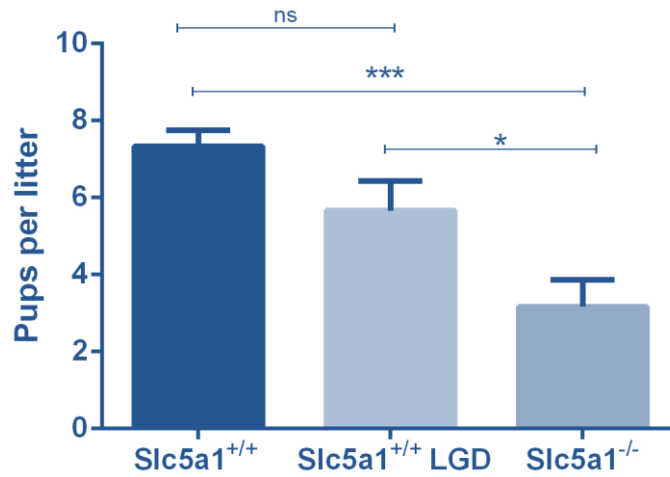

**Figure S5. Impact of low glucose diet on litter size in wild type mice compared to litter size of wild type mice or *Slc5a1*<sup>+/+</sup> mice on regular diet.**

Wild type (*Slc5a1*<sup>+/+</sup>) mice were either given control diet or a low glucose diet (LGD) for 8 weeks. Mice were allowed to breed naturally. No significant difference was seen between *Slc5a1*<sup>+/+</sup> mice on either control diet or LGD. *Slc5a1*<sup>-/-</sup> had significantly lower number of pups. n=6 breedings, \*\*\*P<0.001 and P<0.05 when using Student's *t*-test.

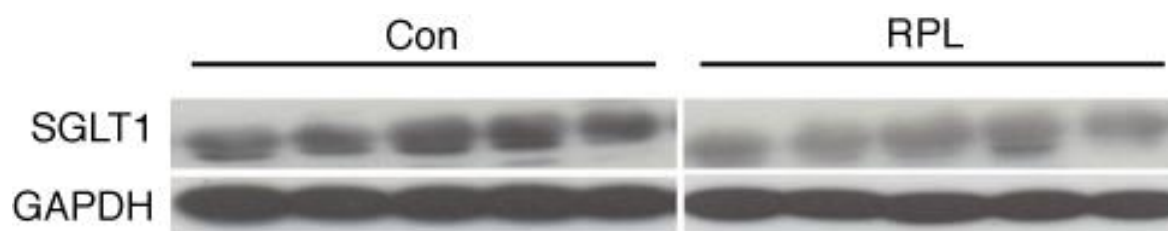

**Figure S6. RPL is associated with reduced endometrial SGLT1 expression during the window of implantation.**

Western blot analysis of SGLT1 expression in mid-luteal endometrial biopsies from control (n = 5) and recurrent pregnancy loss patients (RPL; n = 5).

Original Western blot shown in figure 1b.

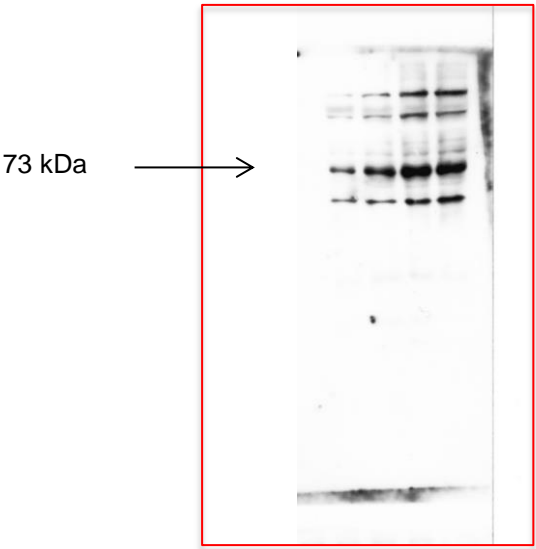

Original Western blot shown in figure 4e and figure S6.

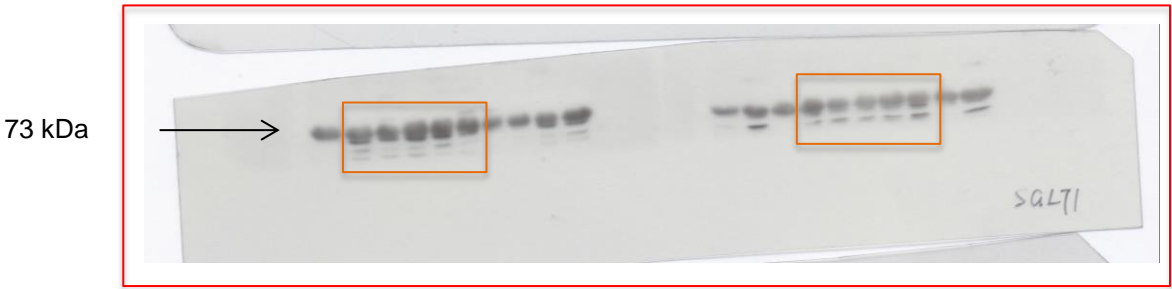

Supplement: Supplementary file 1 — Supplementary Information [file 41598_2017_11674_MOESM1_ESM.pdf]
